# Supplementary material for: Fabrication of detonation nanodiamond@sodium alginate hydrogel beads and their performance in sunlight-triggered water release
Source: Royal Society of Chemistry journal article supplement (doi:10.1039/c9ra03914g), 2019-01-01
Supplement: c9ra03914g1.pdf [file c9ra03914g1.pdf]

## Supporting Information

### **Fabrication of Detonation Nanodiamond@Sodium Alginate Hydrogel Beads and Their Performance of Sunlight- Triggered Water Release**

Dan Zheng <sup>a, b</sup>, Bo Bai <sup>\*, a, b, c, d</sup>, Xiaohui Xu <sup>a, b</sup>, Yunhua He <sup>a, b</sup>, Shan Li <sup>a, b</sup>, Na  
Hu <sup>c, d</sup>, Honglun Wang <sup>c, d</sup>

(<sup>a</sup> Key Laboratory of Subsurface Hydrology and Ecological Effects in Arid Region of the Ministry of Education, Chang'an University, No. 126 Yanta Road, Xi'an 710054, Shanxi, China, <sup>b</sup> College of Environmental Science and Engineering, Chang'an University, Xi'an, 710054, P.R. China; <sup>c</sup> Key Laboratory of Tibetan Medicine Research, Northwest Institute of Plateau Biology, Chinese Academy of Sciences, Xining, 810008, China; <sup>d</sup> Qinghai Provincial Key Laboratory of Tibetan Medicine Research, Xining, 810001, P.R. China)

\* Corresponding author

Email address: baibochina@163.com

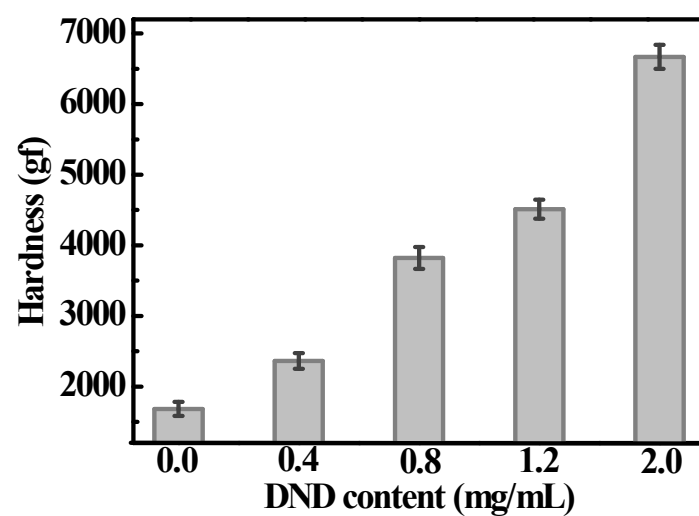

**Figure S1.** Mechanical property of SA-Ca beads and DND@SA hydrogel beads.

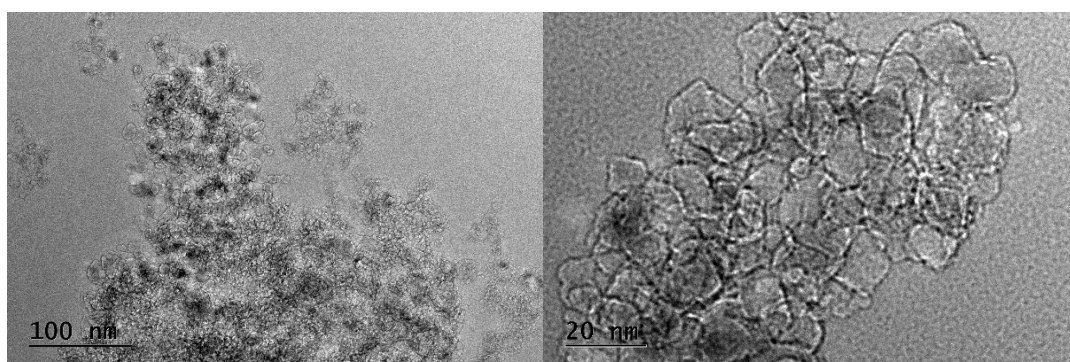

**Figure S2.** TEM images of DND.

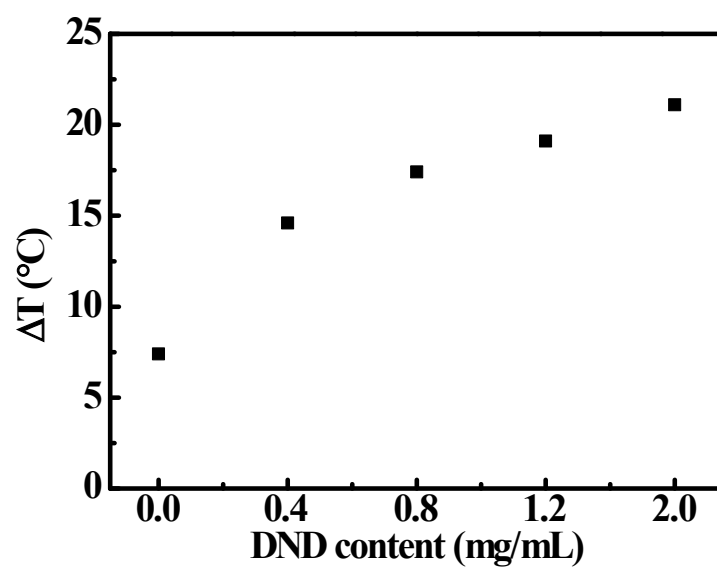

**Figure S3.** Plot of temperature change ( $\Delta T$ ) over a period of 10 min versus the distilled water containing DND@SA hydrogel beads with different DND concentrations.

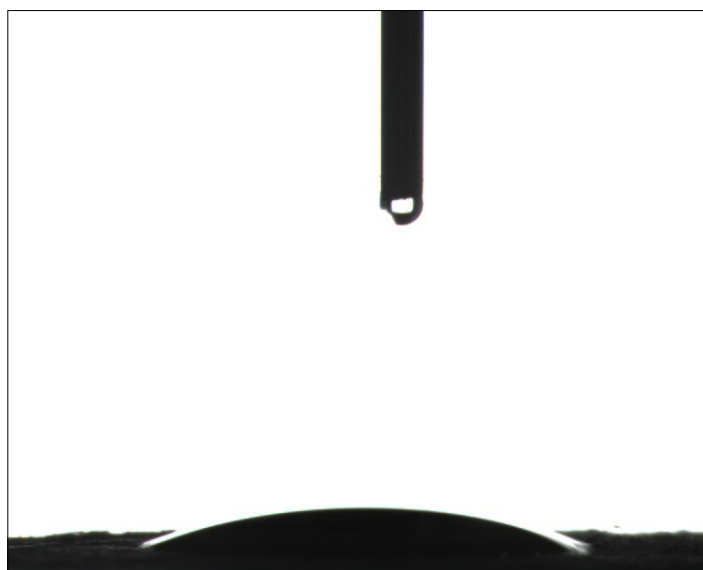

**Figure S4.** Water contact angle of DND at 500ms.

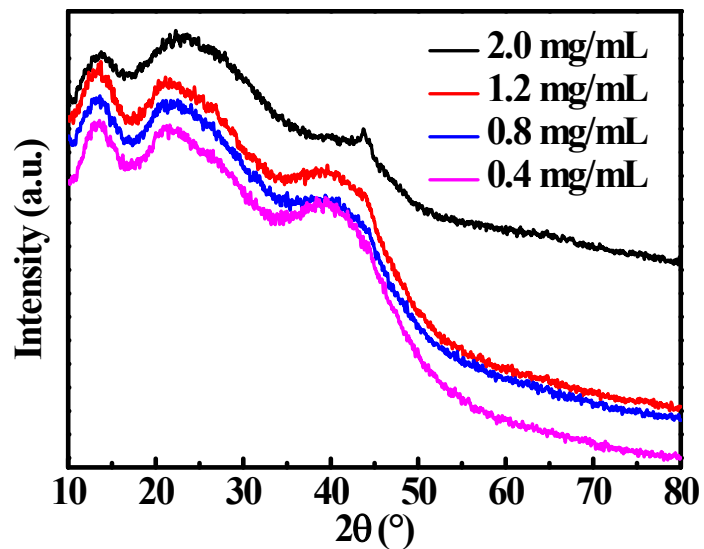

**Figure S5.** XRD of DND@SA hydrogel beads with different amount of DND.

**Table S1** Kinetic parameters for the water adsorbency of DND@SA composite beads in distilled water

| DND content | Se,exp (g g <sup>-1</sup> ) | Pseudo-first-order kinetic model |                                     |                | Pseudo-second-order kinetic model |                                                       |                |
|-------------|-----------------------------|----------------------------------|-------------------------------------|----------------|-----------------------------------|-------------------------------------------------------|----------------|
|             |                             | Se,cal (g g <sup>-1</sup> )      | K <sub>1</sub> (min <sup>-1</sup> ) | R <sup>2</sup> | Se,cal (g g <sup>-1</sup> )       | K <sub>2</sub> (g g <sup>-1</sup> min <sup>-1</sup> ) | R <sup>2</sup> |
| 0mg/mL      | 1.05                        | 1.00                             | 0.0189                              | 0.9807         | 1.12                              | 0.0182                                                | 0.9982         |
| 0.4mg/mL    | 1.38                        | 2.02                             | 0.0302                              | 0.9422         | 1.43                              | 0.0192                                                | 0.9974         |
| 0.8mg/mL    | 1.65                        | 1.31                             | 0.0235                              | 0.9931         | 1.70                              | 0.0279                                                | 0.9994         |
| 1.2mg/mL    | 1.49                        | 1.59                             | 0.0251                              | 0.9525         | 1.55                              | 0.0234                                                | 0.9991         |
| 2.0mg/mL    | 1.24                        | 1.13                             | 0.0182                              | 0.9956         | 1.34                              | 0.0166                                                | 0.9989         |
